# Supplementary material for: Bile Salt Hydrolases with Extended Substrate Specificity Confer a High Level of Resistance to Bile Toxicity on Atopobiaceae Bacteria
Source: MDPI journal article supplement (doi:10.3390/ijms231810980), 2022-09-19
Supplement: s1 [file s1]

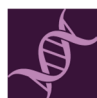

## Supplementary Materials

# Bile Salt Hydrolases with Extended Substrate Specificity Confer a High Level of Resistance to Bile Toxicity on Atopobiaceae Bacteria

Kana Morinaga <sup>1,†</sup>, Hiroyuki Kusada <sup>1,\*</sup> and Hideyuki Tamaki <sup>1,2,\*</sup>

<sup>1</sup> Bioproduction Research Institute, National Institute of Advanced Industrial Science and Technology, Tsukuba 305-8566, Ibaraki, Japan

<sup>2</sup> Faculty of Life and Environmental Sciences, University of Tsukuba, Tsukuba 305-8572, Ibaraki, Japan

\* Correspondence: kusada-hiroyuki@aist.go.jp (H.K.); tamaki-hideyuki@aist.go.jp (H.T.);  
Tel.: +81-29-861-6591 (H.K. & H.T.); Fax: +81-29-861-6587 (H.K. & H.T.)

† These authors contributed equally to this work

### >Original sequence (lcBSH)

```
ATGTGCACCGCCGTTTCGCTTAACCGATAAAAAACAACAACCTCTATGTAGGCCGC  
AATTTGGACTGGGGCGTTCCTTTTGGCGAGAAGCCTCTGCTGGTGCCTGCAGATT  
GGACCTGGCAAAGCCGCCACATAGGGGCTATTGCCACTCAGTCGCCCATCATTG  
GTATGGGGCTGCTCATGAAGGACATGCCTCTTTATTTTGACGCCGTGAACGAGGC  
GGGCCTTTACTGCGCCGGCCTTTCCTTTGCCGAGGCTTCGCACATTACAACGATG  
CTGATCCTTCCAAGATCAACGTCACCAGTTTCGAGATGCCCCCTTTGGGTATGCTCC  
GAGTTCACCTACAGTTGCCAGGTGAAGGAAGCTGCTCAGAACCTCAATATCACC  
AACGACACCTTCGATCCTTCGCTTCCTACTTCCGACCTGCATTGGTTCGTCGCCGA  
CAAAGACCAGTCCATTGTCATCGAGCAAACCGCTGAAGGTCTTAAGATCTACGA  
TGACGGCTTTGACGTGTTGACCAATCAGCCGGACTTCCAGTTCCTACTGCAACAAC  
ATGCGCAATTACATTCACCTGGACGGCGACTGGACACCCGAGCGCACCATGCGC  
AACGCTCATCTCACC GCCCTGGGCGTAGGTCCCTCCGTGATGGGTCTTCCAGGCG  
ACCCCTCTGCCATCTCGCGTTTCGTTTCGCGTTGCACTGCTTAATGCAAGCTATCCC  
GACCAAGACGATGACGCTGACAACATCACCCGCCTCTTCAAGACCCTCAATGCA  
GTCTCTATGGTCAAGGGTTACTGCCGTCAGGAGTCTGGCGACTTTGAATACACCA  
TTTACACCGGCGGTTTCGATAGCGCTACTGGCACTTATCGCTACACCACCTACGA  
TGACCCTGCCTATCACACCTTCTCGTTTGCCGACGCTGCTTCTCTCTGCCCCAG  
CCAACCTCAAGTAG
```

### >Codon optimized sequence (lcBSH)

```
ATGTGCACCGCGGTTTCGTCTGACCGATAAAAAATAACAATCTGTATGTGGGCCGTA  
ATCTGGACTGGGGCGTTCGTTTGGCGAGAAGCCGCTGCTGGTTCGGGCGGATTG  
GACCTGGCAAAGCCGTCACATTGGTGCATCGCGACCCAAAGCCCGATTATCGG  
CATGGGTCTGCTGATGAAAGACATGCCGCTGTACTTCGATGCGGTAAACGAAGCG  
GGTCTGTATTGCGCGGGTCTGAGCTTTGCGGCGGGTTTCGCGCACTATAACGATG  
CGGACCCGAGCAAGATCAACGTGACCAGCTTCGAAATGCCGCTGTGGGTTTGCA  
GCGAGTTTACCACCGTTGCGCAAGTGAAAGAAGCGGCGCAGAACCTGAACATCA  
CCAACGACACCTTCGATCCGAGCCTGCCGACCAGCGACCTGCACTGGTTTGTGGC  
GGATAAAGACCAGAGCATCGTGATCGAGCAAACCGCGGAGGGTCTGAAGATCT
```

ATGATGACGGTTTTGACGTTCTGACCAACCAACCGGACTTCCAGTTTCACTGCAA  
CAACATGCGTAACTACATCCACCTGGACGGTGATTGGACCCCGGAACGTACCAT  
GCGTAACGCGCACCTGACCGCGCTGGGTGTTGGCCCGAGCGTTATGGGTCTGCCG  
GGTGACCCGAGCGCGATCAGCCGTTTCGTTTCGTGTGGCGCTGCTGAACGCGAGCT  
ACCCGGACCAGGATGACGATGCGGACAACATCACCCGCTCTGTTCAAGACCCTGA  
ACGCGGTTAGCATGGTGAAGGGTTACTGCCGTCAGGAAAGCGGTGATTTTCGAGT  
ACACCATCTACACCGGCGGTTTTGATAGCGCGACCGGTACCTATCGTTACACCAC  
CTATGACGATCCGGCGTATCATACCTTTAGCTTTGCGGATGCGGCGAGCCTGAGC  
GCGCCGGCGAACCTGAAATAA

>Original sequence (gfBSH)

ATGTGCACAGCGGTCCGGTTCGCGACCCCGAGGGTCATCTGTACTGCGGTCGTA  
ACTACGACTGGGGCGTCAGCTACGGCGAGGGCCCTGTGGCCGTCCCCGCCGGCT  
GGGAGTGGCGGTCGCGCCACGAGGGCACGTTCAAGACGCGCACCGGCCTGATCG  
GCATGTCCATCGTCGAGGAGGGCATGCCCCTGTTCTTCGACTGCGCCAACGAGGA  
CGGCCTCTATTGTGCCGGGCTCTCGTTTCGCGGGTGGCTTCGGCGTCTACCGCGAC  
CCCGAGGAGGGCAAGACCAACATCGCCAGCTTCGAGATGCCGCTCTGGGTGTGC  
GGGACGTTCTCCTCGGTCGACGAGGTCGAGGAGGCCCTCGCCGATGCCGCGATC  
ACCAACGACAGCTTCTCCTCGGCCCTCGAGCCCTCTTCCCTCCACTGGTTCGTCGC  
CGACGCCGAGCGCTCCATCGTCGTCGAGCAGGACGCCGACGGCCTCAAGGTGAG  
CCACGACGGCTTCGACGTCCTACCAACCAGCCCCGAGTTCAGGTTCCACTGCGA  
GAACATGCGCAACTACGTGCACCTCGACAACGCCTGGACCCCGAGGTCACCCT  
GCGCGAGGAGCACCTACCGCCATGGGCGTCGGTCCCTCGATGATGGGCCTGCC  
TGGCGACCCCTCCGCCATCTCGCGCTTCGTCTGCGTCGCCATCCTCAACGCCCTCT  
ATCCCGACGAGGAGGGGGAGAAGGCCAACGTCGCGCGCCTCTTCAGGACCCTCG  
GGGCCGTCTCGATGGTCAAGGGCCACTGTCGCCAGGAGTCTGGCGACTTCGAGT  
ACACCTTCTACACGGGGGGCTACTCCTCCGCCAGCAAGACGTATTACTACAGCA  
CCTACGAGGACCCGGCTCTGCGCACCGTCACCTTCGACGACTGCAGGGGGGTGCG  
ACGGCCTCGCCAAGGTGGCGGCCGTCTAG

>Codon optimized sequence (gfBSH)

ATGTGCACCGCGGTTTCGTTTTTTCGATCCGGAGGGTCACCTGTATTGCGGTCGTA  
ACTATGATTGGGGCGTGAGCTATGGCGAGGGCCCGGTGGCGGTTCCGGCGGGTT  
GGGAATGGCGTAGCCGTCACGAAGGTACCTTCAAGACCCGTACCGGTCTGATCG  
GTATGAGCATCGTGGAAGAGGGTATGCCGCTGTTTTTCGACTGCGCGAACGAAG  
ACGGTCTGTACTGCGCGGGCCTGAGCTTTGCGGGTGGCTTTGGTGTTTACCGTGAC  
CCGGAAGAGGGCAAAACCAACATTGCGAGCTTCGAGATGCCGCTGTGGGTTTGC  
GGTACCTTTAGCAGCGTTGACGAGGTTGAGGAAGCGCTGGCGGATGCGGCGATC  
ACCAACGACAGCTTCAGCAGCGCGCTGGAACCGAGCAGCCTGCACTGGTTTGT  
GCGGATGCGGAACGTAGCATCGTTGTGGAACAGGACGCGGATGGTCTGAAAGTG  
AGCCACGACGGTTTTGACGTTCTGACCAACCAACCGGAGTTTCGTTTCCACTGCG  
AGAACATGCGTAACTACGTTACCTGGATAACGCGTGGACCCCGGAAGTTACCC  
TGCGTGAGGAACACCTGACCGCGATGGGTGTGGGTCCGAGCATGATGGGCCTGC  
CGGGTGACCCGAGCGCGATCAGCCGTTTTGTGTGCGTTGCGATTCTGAACGCGCT  
GTACCCGGACGAAGAAGGCGAGAAGGCCAACGTTGCGCGTCTGTTCCGTACCCT  
GGGTGCGGTTAGCATGGTTAAAGGTCACCTGCCGTCAGAAAGCGGTGATTTCTGA

GTACACCTTCTACACCGGCGGTTACAGCAGCGCGAGCAAAACCTACTATTACAG  
CACCTACGAAGACCCGGCGCTGCGTACCGTGACCTTTGACGACTGCCGTGGCGT  
GGATGGCCTGGCGAAAGTGGCGGCGGTGTAA
